# Supplementary material for: A Longitudinal Study of the Impact of Social Deprivation and Disease Severity on Employment Status in the UK Cystic Fibrosis Population
Source: PubMed Central journal article supplement (PMC3751887; doi:10.1371/journal.pone.0073322), 2013-08-23

**Figure S1: Logic model to inform analysis of employment status**

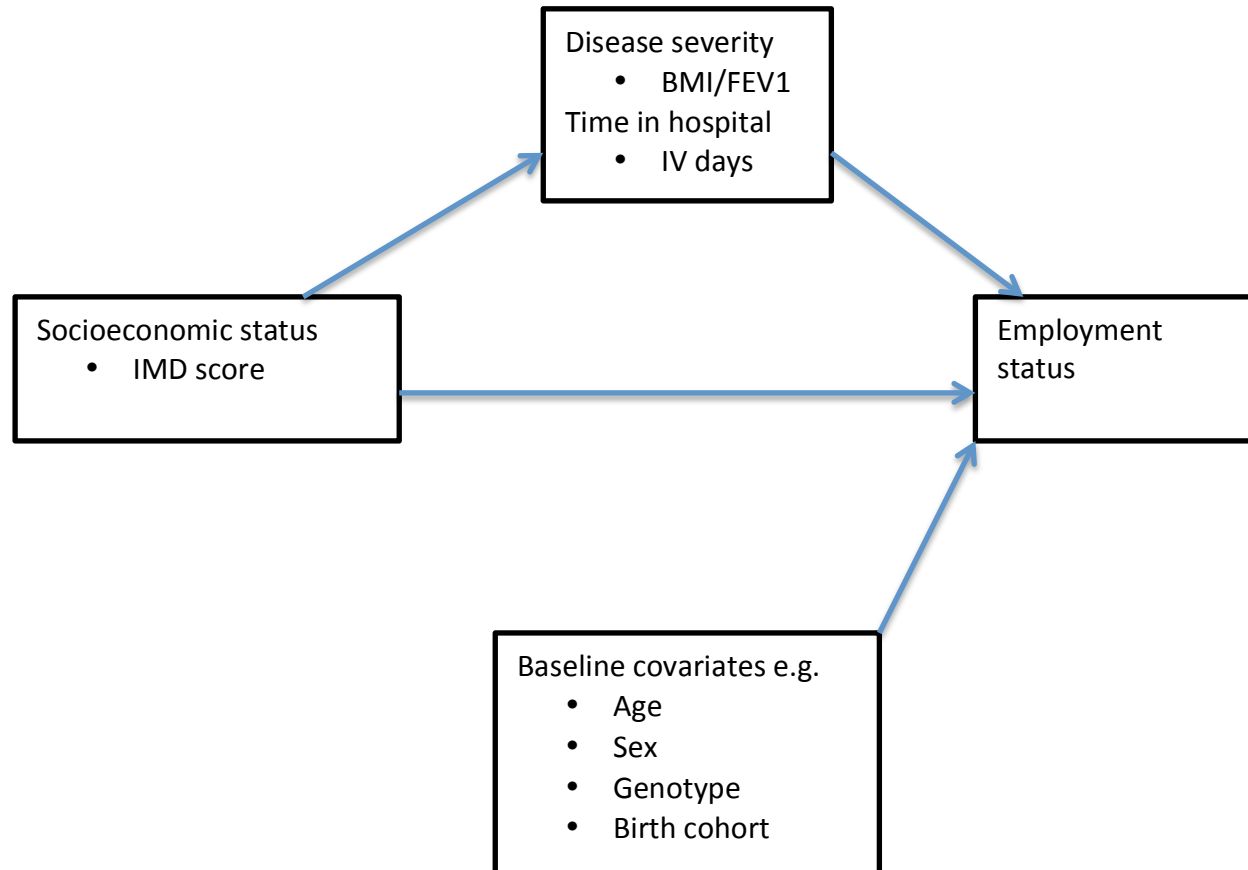

Supplement: pone.0073322.s001.pdf [file pone.0073322.s001.pdf]
